# Supplementary material for: Assessment of Physicians’ Practice in Implementing Antibiotic Stewardship Program in Najran City, Saudi Arabia: A Cross-Sectional Study
Source: MDPI journal article supplement (doi:10.3390/pharmacy12010024), 2024-02-01
Supplement: s1 [file s1]

# **DATA COLLECTION QUESTIONNAIRE**

## **FIRST: SOCIO-DEMOGRAPHIC CHARACTERISTICS:**

1. Age: ..... years
2. Gender:     ☐ Male       ☐ Female
3. Family status:   ☐ Single       ☐ Married
4. Nationality:     ☐ Saudi       ☐ Non-Saudi
5. Position:       ☐ Supervisor   ☐ Practitioner   ☐ Both
6. Qualifications:   ☐ Bachelor   ☐ Diploma   ☐ Master  
                         ☐ PhD       ☐ Board       ☐ Other (specify.....)
7. Healthcare facility:   ☐ PHC center   ☐ Hospital-outpatient clinic  
                                 ☐ Hospital-emergency department       ☐ Polyclinic
8. Work place:   ☐ MOH   ☐ University health services  
                 ☐ Military health services       ☐ National guard health services  
                 ☐ Interior ministry health services   ☐ Private sector
9. Years of experience (.....)

## **SECOND PART: PHYSICIAN'S PARTICIPATION IN EFFICACY OF ASP**

|                                                                                  | Practice of physician                                                                                                                                    | Response |       |           |        |       |
|----------------------------------------------------------------------------------|----------------------------------------------------------------------------------------------------------------------------------------------------------|----------|-------|-----------|--------|-------|
|                                                                                  |                                                                                                                                                          | Always   | Often | Sometimes | Rarely | Never |
| <b>1<sup>st</sup>: Enhancing infection prevention and control</b>                |                                                                                                                                                          |          |       |           |        |       |
| 1                                                                                | I prevent healthcare associated infections from occurring in the first place.                                                                            |          |       |           |        |       |
| 2                                                                                | I prevent transmission of healthcare associated infections when occur.                                                                                   |          |       |           |        |       |
| <b>2<sup>nd</sup>: Controlling source control</b>                                |                                                                                                                                                          |          |       |           |        |       |
| 1                                                                                | I look for the septic source as early as possible.                                                                                                       |          |       |           |        |       |
| 2                                                                                | I control the verified source of infection as soon as possible.                                                                                          |          |       |           |        |       |
| <b>3<sup>rd</sup>: Prescribing antibiotics when they are truly needed</b>        |                                                                                                                                                          |          |       |           |        |       |
| 1                                                                                | I use the antibiotics after a treatable infection has been recognized.                                                                                   |          |       |           |        |       |
| 2                                                                                | I use the antibiotics when there is a high degree of suspicion for infection.                                                                            |          |       |           |        |       |
| 3                                                                                | I provide advice on prudent antibiotic use to individuals.                                                                                               |          |       |           |        |       |
| 4                                                                                | I have good negation skills to convince individuals about unnecessary antibiotic use.                                                                    |          |       |           |        |       |
| <b>4<sup>th</sup>: Prescribing appropriate antibiotics with adequate dosages</b> |                                                                                                                                                          |          |       |           |        |       |
| 1                                                                                | I Initiate empirical antibiotic therapy in patients need immediate treatment.                                                                            |          |       |           |        |       |
| 2                                                                                | I Initiate empirical antibiotic therapy based on local epidemiology.                                                                                     |          |       |           |        |       |
| 3                                                                                | I Initiate empirical antimicrobial therapy based on individual patient risk factors for difficult to treat pathogens and clinical severity of infection. |          |       |           |        |       |
| 4                                                                                | I Initiate empirical antibiotic therapy based on the infection source.                                                                                   |          |       |           |        |       |
| 5                                                                                | I take in account the antibiotic resistance rates when initiate empirical antimicrobial therapy.                                                         |          |       |           |        |       |
| 6                                                                                | I take in account the previous antibiotic when initiate empirical antimicrobial therapy.                                                                 |          |       |           |        |       |



|   |                                                                                                              |  |  |  |  |  |
|---|--------------------------------------------------------------------------------------------------------------|--|--|--|--|--|
| 1 | There is collaboration between all healthcare professionals to shared knowledge and practice to succeed ASP. |  |  |  |  |  |
| 2 | Healthcare institution administration provides adequate support for both developing and sustaining an ASP.   |  |  |  |  |  |
| 3 | Infection control department/unit monitor and prevent healthcare-associated infections.                      |  |  |  |  |  |
| 4 | Pharmacists are key actors for the design and implementation of the stewardship program.                     |  |  |  |  |  |
| 5 | Pharmacists provide feedback to physician about prudent antibiotic use.                                      |  |  |  |  |  |
| 6 | The staff nurses integrate in antimicrobial stewardship.                                                     |  |  |  |  |  |
| 7 | Timely and accurate reporting of microbiology susceptibility test results are available                      |  |  |  |  |  |
| 8 | Surveillance data on antimicrobial resistance are provided periodically                                      |  |  |  |  |  |

**THIRD PART: Practice of physicians regarding a prescribing of antibiotics**

|   | <b>DAILY PRESCRIBING ANTIBIOTICS</b>                                                                | <b>NUMBER</b> |
|---|-----------------------------------------------------------------------------------------------------|---------------|
| 1 | Average number of infection cases you manage daily.                                                 |               |
| 2 | Average number of infection cases you manage daily with symptomatic treatment (NO ANTIBIOTIC).      |               |
| 3 | Average number of infection cases you manage daily with delayed antibiotic prescribing treatment.   |               |
| 4 | Average number of infection cases you manage daily with initiated antibiotic prescribing treatment. |               |
